1 **Succession comprises a sequence of threshold-induced community assembly processes towards**  
2 **multidiversity**

3 Maximilian Hanusch<sup>1</sup>, Xie He<sup>1</sup>, Victoria Ruiz-Hernández<sup>1</sup>, Robert R. Junker<sup>1,2\*</sup>

4 <sup>1</sup>Department of Biosciences, Paris Lodron University Salzburg, 5020 Salzburg, Austria

5 <sup>2</sup>Evolutionary Ecology of Plants, Department of Biology, Philipps-University Marburg, 35043 Marburg,  
6 Germany

7 \*Corresponding author: robert.junker@uni-marburg.de

8 **Keywords:** succession, community assembly, ecological threshold, multidiversity, regime-shift

9 **Abstract**

10 Research on ecological successions and community assembly shaped our understanding of community  
11 establishment, co-existence, and diversity. Although both lines of research address the same processes  
12 such as dispersal, species sorting, and biotic interactions, they lack unifying concepts. However, recent  
13 theoretical advances proposed to integrate both research lines and thus provided hypotheses on how  
14 communities assemble over time and form complex ecological systems. This framework predicts a  
15 sequence of stochastic and niche-based processes along successional gradients. Shifts in these  
16 assembly processes are assumed to occur abruptly once abiotic and biotic factors dominate over  
17 dispersal as main driver of community assembly. Considering the multidiversity composed of five  
18 organismal groups including plants, animals, and microbes, we empirically show that stochastic  
19 dispersal-dominated community assembly is replaced by environmental filters and biotic interactions  
20 after around 60 years of succession in a glacier forefield. The niche-based character of later  
21 successional processes is further supported by a pronounced decline in multi-beta-diversity after the  
22 shift in assembly processes. Our results support recent theories and provide new insights into the  
23 emergence of multidiverse and complex ecosystems. Our study will stimulate updates of concepts of

24 community assembly considering multiple taxa with unique and complementary ecological roles and  
25 help to bridge the gap between research on successions and community assembly.

## 26 **Introduction**

27 Succession and community assembly research are neighboring fields in ecology, each with a long  
28 history of constructive debates and a large body of literature. Both research lines are founded on  
29 overlapping concepts considering processes such as dispersal, environmental filtering, biotic  
30 interactions, and stochasticity as structuring elements of local communities and ecosystems.  
31 Nevertheless, succession and community assembly research focus on different spatial and temporal  
32 scales, which may have hindered a mutual exchange of ideas (Chang & HilleRisLambers, 2016).  
33 Succession research relates to the initial development of ecosystems and communities over time.  
34 Community assembly studies, on the other hand, try to elucidate the drivers of local diversity patterns  
35 regardless of temporal components. Attempts to synthesize the two fields led to the development of  
36 an integrated conceptual framework of succession and community assembly dynamics. Here, drivers  
37 of community structure are considered from an explicitly temporal perspective, assuming a temporal  
38 sequence of assembly processes shifting from dispersal to niche-based processes along the course of  
39 succession (Chang & HilleRisLambers, 2016). The proposed framework also emphasizes the importance  
40 of threshold dynamics, predicting that gradual changes in the abiotic and biotic environment are  
41 followed by rapid shifts in the predominant processes that determine community assembly (Suding &  
42 Hobbs, 2009; Kadowaki & al., 2018). These shifts are expected to be associated with various  
43 community level responses such as changes in diversity, species composition and functionality  
44 (Scheffer & al., 2001; Suding & Hobbs, 2009; Chang & HilleRisLambers, 2016). Recent research suggests  
45 that sudden ecosystem shifts are not restricted to changes in species composition of single organismal  
46 groups but that local diversity patterns emerge from on-site interactions between multiple taxa (Lu &  
47 Hedin, 2019; Berdugo & al., 2020). Multidiversity, an aggregate measure of biodiversity that integrates  
48 the standardized diversities of multiple taxa (Allan & al., 2014), has been shown to reflect ecosystem  
49 functionality (Delgado-Baquerizo & al., 2020), species composition (Felipe-Lucia & al., 2020) and

50 multitrophic interactions (Manning & al., 2015) more accurately than diversity measures considering  
51 only one taxon. Additionally, the responses of different organismal groups to successional gradients  
52 may differ either due to stochastic or deterministic drivers (Kaufmann, 2001; Bala'id & al., 2012; Fenton  
53 & Bergeron, 2013; Dini-Andreote & al., 2015; Måren & al., 2018) and thus conclusions about the  
54 primary assembly processes may be biased in studies considering a single taxon only (Pulsford & al.,  
55 2016). Taken into account that multidiversity more precisely reflects ecosystem responses and  
56 functions, we tested predictions deduced from recent contemporary succession hypotheses using a  
57 dataset on multidiversity comprising inventories of plants, animals, bacteria and fungi along a  
58 successional gradient.

59 Most studies on multidiversity have been undertaken in well-developed ecosystems that have  
60 undergone severe anthropogenic alterations in the past and focused on the drivers of biodiversity  
61 decline (Allan & al., 2014; Manning & al., 2015; Felipe-Lucia & al., 2020). The mechanisms behind the  
62 successional emergence of multidiversity and ecosystem complexity under natural conditions,  
63 however, are yet poorly understood. Thus, considering multidiversity within a successional framework  
64 will help to gain new insights into the temporal dynamics of the processes that shape the initial  
65 emergence of biodiversity in natural ecosystems that comprise manifold organismal groups with  
66 unique and complementary ecological functions. The assumed changes of assembly processes along  
67 succession, a decrease in the importance of dispersal and a simultaneous increase of mutual  
68 interactions between organisms and the environment, is expected to lead to strong interdependencies  
69 between taxa in older successional stages (Odum, 1969; Chang & HilleRisLambers, 2016). For instance,  
70 interactions between plants and soil inhabiting microorganisms intensify with successional age (Chen  
71 & al., 2019) and regulate plant-animal interactions (Howard & al., 2020). Strong interdependencies  
72 between taxa result in aggregated co-occurrence patterns (Ohlmann & al., 2018), which lowers the  
73 potential for a high species turnover across local assemblages; and may thus be reflected in low beta-  
74 diversity.

75 We adopted the concept of multidiversity to empirically test predictions of the integrated framework  
76 of succession and community assembly dynamics on an ecological gradient of primary succession  
77 following glacial retreat in the Austrian Alps (Junker & al., 2020). We assessed the multidiversity and  
78 multi-betadiversity of five organismal groups, including vascular plants, bryophytes, invertebrates, and  
79 soil inhabiting fungi and bacteria on 110 plots spanning 170 years of primary succession. We estimated  
80 multidiversity by the sum of ranked normalized Shannon-diversities and calculated multi-betadiversity  
81 as the mean Bray-Curtis dissimilarities between plots regarding the composition of individual taxa (see  
82 methods). According to the conceptual framework (Chang & HilleRisLambers, 2016), we predicted that  
83 community assembly will undergo a rapid shift that is induced by a sudden change of the biotic and  
84 abiotic environment. Accordingly, we identified a threshold in multidiversity development and  
85 estimated the relative importance of dispersal, environmental and biotic drivers on the assembly of  
86 the multidiverse community before and after the threshold. We further highlighted the more  
87 deterministic character of community assembly after the shift by comparing multi-betadiversity  
88 estimates of the early and late successional communities.

## 89 **Methods**

90 **Study Design.** The study was conducted in the long-term ecological research platform  
91 Ödenwinkel which was established in 2019 in the Hohe Tauern National Park, Austria (Dynamic  
92 Ecological Information Management System – site and dataset registry:  
93 <https://deims.org/activity/fefd07db-2f16-46eb-8883-f10fbc9d13a3>, last access: March 2021). A total  
94 of  $n = 135$  permanent plots was established within the glacier forefield of the Ödenwinkelkees which  
95 was covered by ice at the latest glacial maximum in the Little Ice Age around 1850. For this study, we  
96 used a subset of  $n = 110$  plots with complete datasets with all biotic and abiotic variables available.  
97 The plots represent a successional gradient spanning over 1.7km in length and were evenly distributed  
98 within the glacier forefield at an altitude ranging from 2070 to 2170 m a.s.l. Plots were defined as  
99 squares with an area of 1 m<sup>2</sup> and were all oriented in the same cardinal direction. Further details on

100 the design of the research platform, exact plot positions and details on the surrounding environment  
101 can be found in Junker et al. (2020).

102 **Sampling.** In 2019, we identified all vascular plant and bryophyte species present on the plots and  
103 estimated their cover with a resolution of 0.1 %. We sampled above-ground arthropod diversity by  
104 installing two pitfall traps on each plot. Traps were set active for a total of  $n=7$  days. The abundance of  
105 all arthropods, excluding Collembola and Acari, larger than 3 mm was counted. The abundance of  
106 Collembola and Acari and of animals smaller than 3mm was estimated based on random samples of  
107 aliquots of the total sample. All arthropods and other animals are identified to the order level. Soil  
108 inhabiting bacteria and fungi were sampled from soil cores from an approximate depth of 3cm. Soil-  
109 microbiome samples were analyzed by next-generation sequencing and microbiome profiling of  
110 isolated DNA was performed by Eurofins Genomics (Ebersberg, Germany). Prior to the statistical  
111 analysis of microbial communities, we performed a cumulative sum scaling (CSS) normalization (R  
112 package “metagenomeSeq” v1.28.2) on the count data to account for differences in sequencing depth  
113 among samples. Detailed information on the sampling strategies of all organismal groups can be found  
114 in Junker et al. (2020). Temperature measurements were done by installing temperature loggers  
115 (MF1921G iButton, Fuchs Elektronik, Weinheim, Germany) 10 cm north of each plot centre, at a depth  
116 of 3 cm below ground. Mean seasonal temperature was calculated on the basis of the recordings  
117 ranging from 26th of June to 16th of September representing the period in which the plots were free  
118 of permanent snow cover before and after the winter 2019/2020. In 2020, soil samples were taken  
119 and soil nutrients (Ca, P, K, Mg and total  $N_2$ ) as well as soil pH were measured on all plots (except for  
120 plot 129) by AGROLAB Agrar und Umwelt GmbH (Sarstedt, Germany). Soil nutrient analysis was  
121 performed according to the Ö-Norm Boden: L 1087: 2012-12 (K and P - mg/1000g), L 1093: 2010-12  
122 (Mg - mg/1000g) and L 1083: 2006-04 (pH). Total  $N_2$  (%) was determined according to the DIN EN  
123 16168: 2012-11. Detailed information on the sampling strategy can be found in Junker et. al (2020).

124 **Calculation of multidiversity and breaking point analysis.** Multidiversity is defined as the  
125 cumulative diversity of a number of taxonomic groups (Allan & al., 2014). The multidiversity of the  $n =$

126 110 plots composed of the diversities of vascular plants, bryophytes, invertebrates, fungi, and bacteria  
127 present in each plot and was defined as follows: First, we calculated the Shannon diversities (H) of each  
128 of the taxonomic groups in each plot. Second, we ranked the plots by increasing diversity for each of  
129 the five taxonomic groups individually, i.e. for each plot we received  $n = 5$  ranks. The mean rank of  
130 each plot was defined as multidiversity  $mD$ . For better interpretability of the index, we then normalized  
131 the mean ranks as  $x' = ((x - \min(x)) / (\max(x) - \min(x)))$  to scale them between zero and one. Ranks were  
132 used to give the same weighting to each taxonomic group despite deviations in the absolute values of  
133 Shannon diversity and to reduce the impact of outliers in  $mD$  values. To account for differences in the  
134 sampling depth of the microbial raw dataset, we performed multiple rarefaction prior to the  
135 calculation of Shannon diversity by averaging the results of  $n = 999$  iterations (R package “rtk” v0.2.5.7)  
136 instead of using the CSS-normalized dataset.

137 According to the hypothesis of community assembly dynamics (Chang & HilleRisLambers, 2016) and  
138 by visual inspection of the relationship between multidiversity and time since deglaciation we  
139 expected two different stages of community establishment along the successional gradient. These  
140 stages are separable by the transition from a developing (characterized by an increase in  
141 multidiversity) to a more stationary ecosystem (characterized by non-monotonic variation in  
142 multidiversity over time). Such non-linear associations are suggestive of regime-shifts of the ecosystem  
143 and can be interpreted as ecological thresholds (Groffman & al., 2006). We screened the age gradient  
144 for predicted threshold by using breaking point analysis. We iteratively fitted all possible piecewise  
145 linear models with  $mD$  values as the dependent and plot index number as the independent variables  
146 and defined the breaking point as the plot number that allowed the fitting of the two piecewise linear  
147 models with the lowest mean standard error (Crawley, 2012). The resulting plot index was used to  
148 distinguish between early and late successional stages.

149 **Community taxa occurrence.** To visualize the distribution of individual taxa and thus the  
150 community wide taxonomic turnover along the successional gradient, we estimated the abundance  
151 optimum of each taxon that occurred on at least three plots. Abundance optima were estimated by

152 calculating the mean plot of occurrence weighted by the abundance of each taxon (i.e. cover for  
153 vascular plants and bryophytes, individual count for invertebrates and CSS-normalized read number  
154 for microorganisms). We calculated the relative abundance per plot for each taxon by using z-scores  
155 of abundances. For each taxon, the mean abundance was set as 0 with one standard deviation as +1  
156 or -1. Resulting z-scores were then rescaled between -1 and 1. Range size was estimated by calculating  
157 the variance of occurrence plots (i.e. the span of plots on which a taxon was found along the gradient)  
158 weighted by the abundance of the taxon on the respective plots.

159 **Path analysis.** We used path-analysis i) to model the influence of the abiotic environment on the  
160 diversities of all taxonomic groups individually ii) to estimate the strength of community covariances  
161 between the diversities of those groups iii) to infer the effect sizes of the diversity of each group on  
162 total  $mD$  and iv) estimate the strength of indirect effects of the exogenous variables that are mediated  
163 through the organismal groups on  $mD$ . We built separate models with identical structure for the early  
164 ( $n = 49$  plots) and late ( $n = 61$  plots) successional stages. The stages were delineated by the threshold  
165 identified in the breakpoint analysis. Exogenous variables in the model were time since deglaciation  
166 and mean soil temperature of the growing season. Time since deglaciation reflects the plot age and  
167 can be seen as a proxy for the increasing chance of heterogeneous dispersal events that occur over  
168 time. The mean temperature of the growing the growing season is an estimate for environmental  
169 heterogeneity and has been shown to directly and indirectly affect diversity on various trophic levels  
170 (Ohler & al., 2020). All variables were We first ran a full model that included soil pH and soil nutrient  
171 content as additional exogenous variables. None of the two variables showed a significant direct effect  
172 on any organismal group or a significant indirect effect on multidiversity during either the young or  
173 late successional stage. Accordingly, we stepwise removed the two variables from the model while  
174 cross-checking whether the effect strength of one variable became significant in the absence of the  
175 other variable. As no significant effects occurred or the model fit significantly decreased, we decided  
176 to remove both variables from the final model. Within the model, the strength of residual covariance  
177 between the diversities of all taxonomic groups was estimated while accounting for influences the of

178 time since deglaciation and temperature. If corrected for an underlying common cause, such as  
179 environmental autocorrelation, strong covariances between members of a community can be  
180 interpreted as biotic interactions and especially positive community covariances are indicative of  
181 facilitative effects within the community (Houlahan & al., 2007; Ranta & al., 2008). All path-models  
182 were estimated using the R-package “lavaan” v0.6-7.

183 **Multibetadiversity.** We defined Multibetadiversity (*mbD*) as the cumulative averaged pairwise-  
184 dissimilarity across a number of organismal groups. First, we split the total community composition  
185 data table (sites x species,  $n = 110$  plots) for each organismal group into two tables containing the plots  
186 before ( $n = 49$  plots) and after ( $n = 69$  plots) the threshold. Second, we performed Bootstrapping (BS)  
187 on the subset tables for each of the  $n = 5$  organismal groups. BS was done for each organismal group  
188 on both successional stages separately. Each BS-replicate consisted of the following steps: First, we  
189 generated  $n = 1000$  new community tables for each organismal group by randomly sampling  $n = 49$   
190 plots (number of plots in the early successional stage) from the subset tables allowing replacement  
191 draws. Second, we calculated the mean Bray-Curtis dissimilarity for each of the resulting community  
192 tables. Subsequently, we calculated *mbD* as the mean of the  $n = 5$  dissimilarity values per BS-replicate.  
193 BS was necessary to account for differences in sample sizes and to obtain a confidence interval for the  
194 resulting beta diversity estimates per successional stage.

## 195 **Results**

196 We screened the gradient for the predicted shift from a developing (characterized by an increase in  
197 multidiversity) to a more stationary ecosystem (characterized by non-monotonic variation in  
198 multidiversity over time) using breaking point analysis, which detects changes in the slope of  
199 associations. According to Groffman (2006) breaking points represent ecological thresholds, which is  
200 characterized by a rapid change of the slope in the association between time since deglaciation as  
201 explanatory variable and multidiversity as dependent variable in our study. We identified such a  
202 threshold after 63 years of ecosystem development. Resulting piecewise linear models showed a  
203 significant increase in multidiversity during the early successional stage and a non-significant



204 relationship for the late successional stage (early:  $t_{57} = 7.01, p < 0.001, r^2=0.51$ ; late:  
205  $t_{53}=0.24, p=0.80, r^2=0.001$ ; Fig.1a). The threshold became also evident in the change of community  
206 composition with different sets of taxa before and after the breaking point. Prior to the threshold,  
207 communities mainly consist of species that reach their abundance optima early in succession. These  
208 pioneering species were soon accompanied by taxa with no clear preference of early or late  
209 successional stages leading to an increase in multidiversity over time. After the threshold, specialists  
210 for early successions are replaced by specialists for late successional stages, consequently  
211 multidiversity remained stationary over time (Fig. 1b).

212 Further, the framework predicts that shifts from a developing to a more stationary ecosystem are  
213 associated with alterations in the community's assembly processes (Chang & HilleRisLambers, 2016).  
214 Dispersal events are regarded as stochastic or neutral events that occur at a random frequency (Lowe  
215 & McPeck, 2014). In a successional setting, this translates to an increased chance of successful  
216 colonization events on a plot over the course of time. Accordingly, we expected a strongly dispersal  
217 driven assembly before the threshold and a pronounced influence of the environment, as well as  
218 increased biotic interactions that can be expressed as community covariances (Houlihan & al., 2007)  
219 after the threshold.

220 To quantify the relative importance of dispersal and environmental drivers, we specified a path model  
221 in which time since deglaciation (as a proxy for dispersal as main driver) and mean seasonal soil  
222 temperature (as environmental factor that is important for diversity of several trophic levels (Ohler &  
223 al., 2020)) act as exogenous variables and directly affect diversities of single organismal groups. The  
224 total effects of the dispersal and environmental drivers on multidiversity were estimated as indirect  
225 effects mediated through the organismal groups. We also tested the effects of other environmental  
226 variables, such as soil nutrient content and soil-pH value but could not detect any significant effects  
227 and thus removed these variables from the final model (see methods and Supplementary tables). Biotic  
228 interactions were modeled as the residual covariance among the diversity values of all organismal  
229 groups. The path analysis provided good model fit (Model fit:  $p_{\text{chi-square}} > 0.05$ ; CFI  $> 0.95$ ; TLI  $\geq 0.9$ ; SRMR

230 < 0.09;  $RMSEA_{early} < 0.05$ ;  $RMSEA_{late} = 0.079$  with lower bound of confidence interval = 0) and revealed  
231 different influences of the exogenous variables between the early and late successional environments  
232 (Figure 2). During early succession, time since deglaciation had a strong positive effect on the diversity  
233 of all organismal groups, whereas the effect of temperature was only significant for bacteria. Time  
234 since deglaciation also had a significant positive indirect effect on total multidiversity during early  
235 succession, whereas temperature did not affect multidiversity (Figure 2a). Furthermore, diversities of  
236 the five organismal groups varied independently of each other suggesting little or no mutual  
237 influences. In late succession, mean soil temperature had significant positive direct effects on the  
238 diversity of vascular plants and bryophytes and a significantly positive indirect effect on multidiversity.  
239 Plot age had no longer an effect on multidiversity and we detected positive residual covariances  
240 between vascular plant, invertebrate and bacterial diversities with fungal diversity, suggesting mutual  
241 influences between taxa (Figure 2b). Our data do not allow to directly test for mutual influences  
242 between organismal groups on the taxon level, but we find a strong pattern of positive community  
243 covariances after accounting for environmental variation, that is indicative of facilitative processes and  
244 biotic dependencies within the community (Houlahan & al., 2007; Ranta & al., 2008). During the initial  
245 period of ecosystem formation, communities are built up by organisms that enter a plot by non-  
246 directed dispersal. Thus, stochastic mechanisms (i.e. drift, dispersal) dominate the assembly process,  
247 which is represented in the path analysis by the linear increase of multidiversity with time. After the  
248 threshold, multidiversity became stationary and the stochastic community assembly processes was  
249 replaced by more deterministic assembly processes: the strong effect of time since deglaciation  
250 disappeared in favor of local, niche-based processes, such as environmental filtering and biotic  
251 interactions that are reflected in the pronounced effect of temperature on multidiversity and increased  
252 biotic covariances (Chase & Myers, 2011).

253 One prediction of the shift from dispersal dominated stochastic events in early successional stages to  
254 niche-based processes in late successional stages is that beta-diversity among communities will  
255 decrease after the threshold. To test this prediction, we calculated a measure of total community

256 dissimilarity, multi-betadiversity for both successional stages. We bootstrapped Bray-Curtis similarity  
257 matrices for  $n = 1000$  times for each of the five taxa individually and calculated multi-beta-diversity as  
258 the mean similarity of the five organismal groups per bootstrapping draw for the early and late  
259 successional stage. Bootstrapping was necessary to account for different sample sizes in the two  
260 successional stages and to obtain confidence intervals for multi-beta-diversity indices. Despite  
261 different trajectories of betadiversity for different organismal groups, multi-betadiversity was  
262 significantly lower in the late successional stage, indicating more homogenous communities across the  
263 plots (Fig. 3).

## 264 **Discussion**

265 Our results are the first empirical test of the conceptual framework integrating succession and  
266 community assembly dynamics proposed by Chang & HilleRisLambers (2016). We showed that  
267 threshold dynamics play an important role in the assembly of multidiverse communities under natural  
268 conditions and that these thresholds are associated with substantial changes in the community  
269 assembly processes. So far, the importance of threshold dynamics have been recognized for  
270 anthropogenically altered ecosystems either as catastrophic shifts with respect to climate change  
271 (Scheffer & al., 2001; Berdugo & al., 2020) or for restoration efforts of anthropogenically altered  
272 landscapes (Suding & Hobbs, 2009; Kadowaki & al., 2018). Acknowledging the effects of threshold  
273 dynamics during the development of natural multidiverse ecosystems, and their universality in  
274 ecological systems provides valuable insights into the patterns and processes of initial terrestrial-  
275 ecosystem development. Although different organismal groups follow individual assembly trajectories  
276 during primary succession, multidiversity is mainly promoted by stochastic drivers during the initial  
277 phase of ecosystem development, most assumably by heterogenous dispersal events. Over the course  
278 of succession, stochasticity is replaced by environmental filtering and biotic interactions as the  
279 structuring mechanism of multidiversity. Understanding the relative importance and temporal  
280 dynamic of deterministic and stochastic processes is a key challenge in community ecology, especially  
281 in natural systems and has been in the center of broad debates among ecologists. Thus, our study is a

282 strong contribution to the long-required synthesis of community ecological theories into succession  
283 research, acknowledging the fundamental importance of abrupt state shifts in natural ecosystems.  
284 These results are not only a proof of concept but also stress that succession is a multi-faceted rather  
285 than a linear process that comprises a sequence of assembly processes towards multidiversity and  
286 ecosystem complexity.

287

288 **Figures**

289 Figure 1: Multidiversity and multi-taxa-community composition along the successional gradient. A)  
290 Multidiversity increases during the early successional stage and remains stationary as succession  
291 continues. The vertical dashed line indicates the estimated threshold in multidiversity development,  
292 which is the threshold in community assembly as predicted by the framework of Chang &  
293 HilleRisLambers (2016). Grey regression lines indicate the correlation between multidiversity and time  
294 since deglaciation in the successional stages before and after the threshold (early:  $t_{57} = 7.01$ ,  $p <$   
295  $0.001$ ,  $r^2=0.51$ ; late:  $t_{53}=0.24$ ,  $p=0.80$ ,  $r^2=0.001$ ); grey dashed horizontal line marks the breaking point.  
296 B) Single taxa occurrence along the successional gradient for each taxon that occurs on at least three  
297 plots along the gradient. Tiles indicate the relative abundance of each taxon at a given plot relative to  
298 the mean abundance of the taxon along the gradient. Relative taxon abundance is color-coded and  
299 reflects z-scores with the mean abundance as 0 and one standard deviation as +1 or -1, rescaled  
300 between -1 and 1. Multidiversity is indicated as red density plot on top of the community composition  
301 plot. Grey density plot on the left side indicates the range size of the taxa, i.e whether their occurrence  
302 is restricted to a narrow range of the successional gradient or whether taxa occur along the whole  
303 gradient. Black bars on the right represent the organismal group of the taxa in each row, symbols of  
304 organismal groups are ordered by decreasing frequency; white dashed horizontal line marks the  
305 threshold.

306

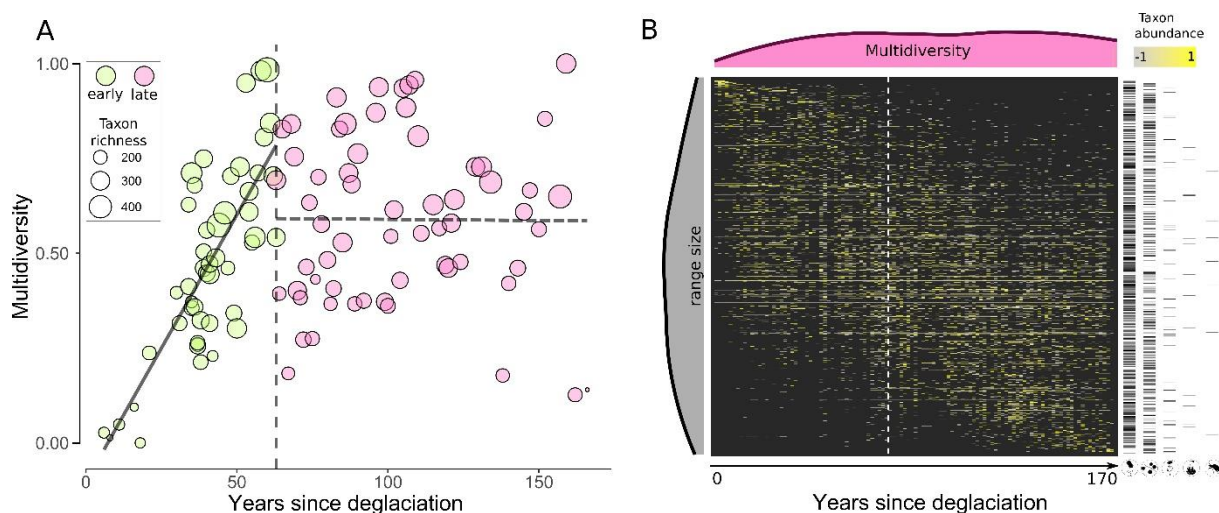

308 Figure 2: Path analysis regarding the effects of stochastic and deterministic drivers on the multidiverse  
 309 community for the early and late successional stages. Time since deglaciation and mean seasonal  
 310 temperature act as exogenous variables with directed effects on the diversities of vascular plants,  
 311 bryophyte diversity, invertebrates, and soil inhabiting fungi and bacteria. Indirect effects of exogenous  
 312 variables on multidiversity were calculated by mediation analysis through the direct effects of the  
 313 organismal groups on multidiversity. Biotic interactions are modeled as covariances between  
 314 organismal groups. Numbers represent standardized path coefficients and are given for significant  
 315 paths only.

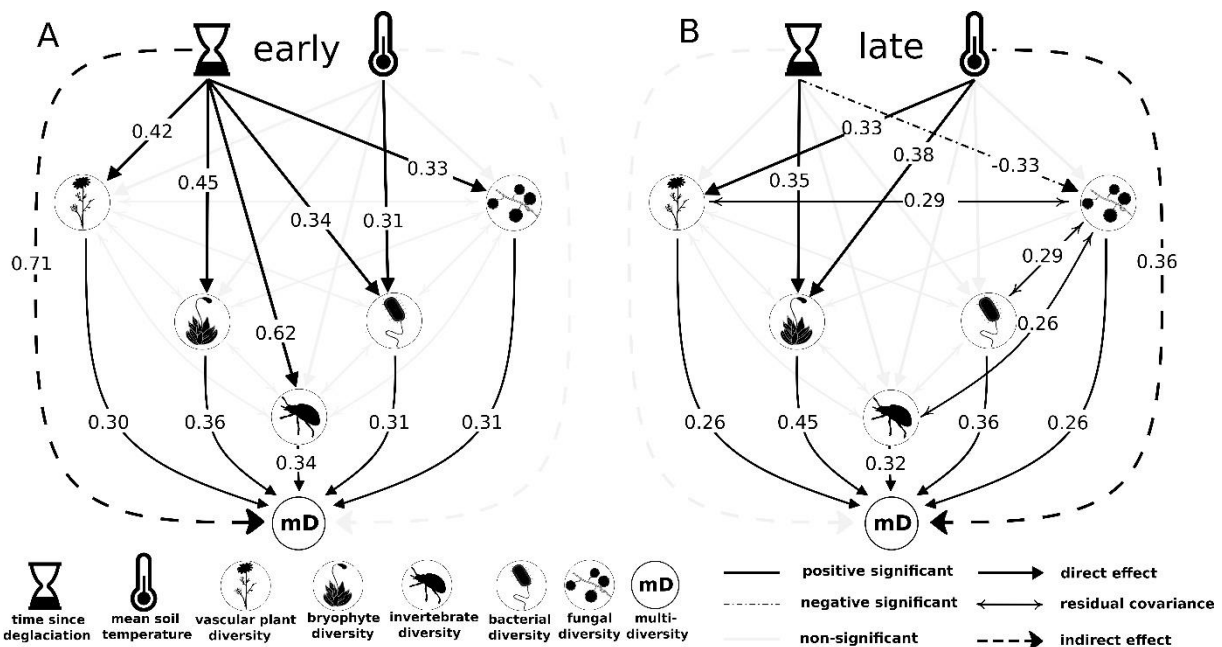

316

317 Figure 3: Betadiversity values for each organismal group and community-wide multi-betadiversity  
318 values for the early and late successional stages. Mean Bray-Curtis dissimilarities were used to  
319 calculate betadiversity and multi-betadiversity values. Green violin plots resemble the dissimilarity  
320 values of the early successional stage (n=49 plots), rose violin plots indicate the late successional stage  
321 (n=61 plots). Density plots indicate the distribution of the mean dissimilarities for n=1000 bootstrap  
322 draws. Boxplots indicate the upper and lower quartile of the estimates and the size of the notch  
323 represents the confidence interval of the median. A) mean of all organismal groups, i.e. multi-  
324 betadiversity B) bacteria C) fungi D) vascular plants E) bryophytes F) invertebrates

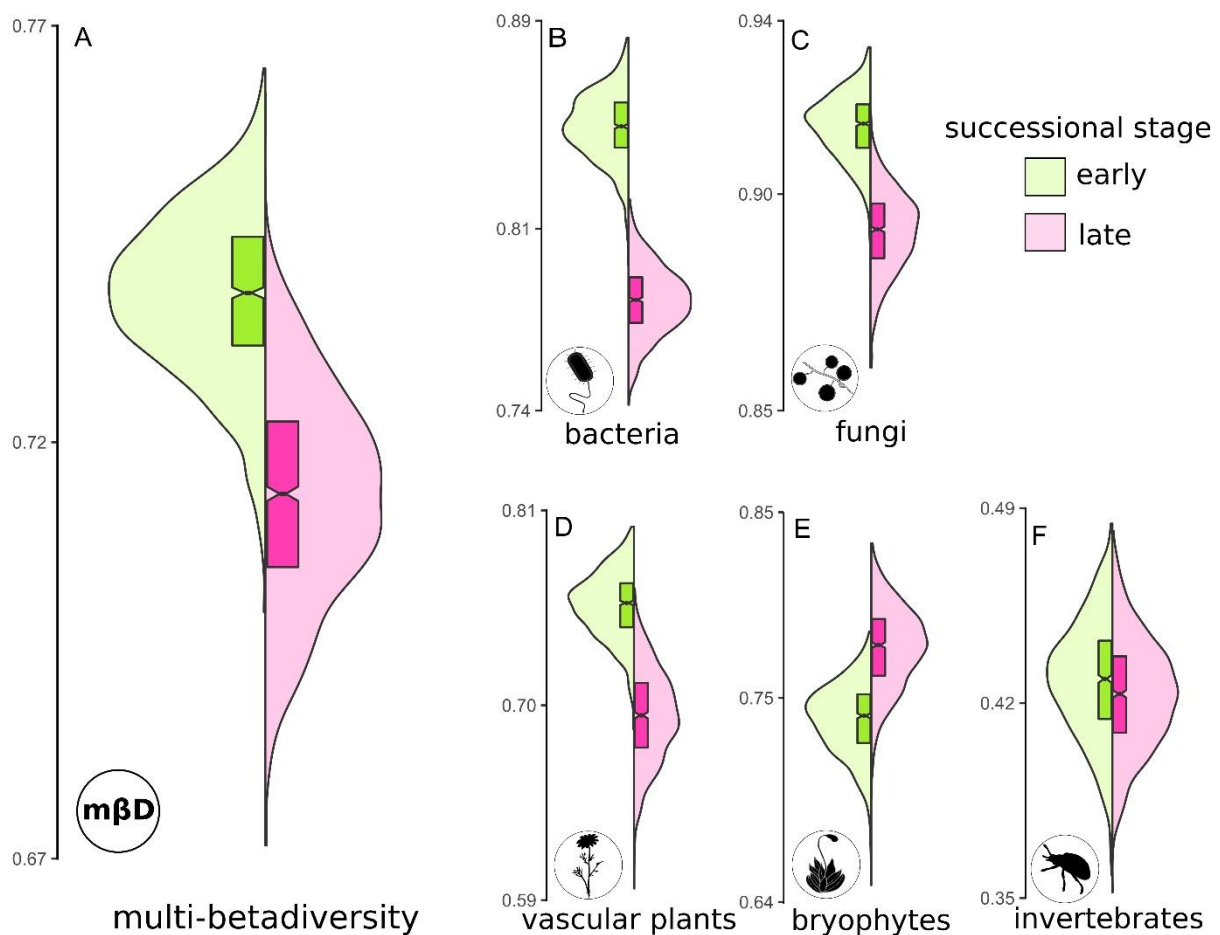

325

326 **References**

- 327 **Allan, E., Bossdorf, O., Dormann, C.F., Prati, D., Gossner, M.M., Tschardt, T., Blüthgen, N., Bellach,**  
328 **M., Birkhofer, K., Boch, S., Böhm, S., Börschig, C., Chatzinotas, A., Christ, S., Daniel, R.,**  
329 **Diekötter, T., Fischer, C., Friedl, T., Glaser, K., Hallmann, C., Hodac, L., Hölzel, N., Jung, K., Klein,**  
330 **A.M., Klaus, V.H., Kleinebecker, T., Krauss, J., Lange, M., Morris, E.K., Müller, J., Nacke, H.,**  
331 **Pašalić, E., Rillig, M.C., Rothenwöhrer, C., Schall, P., Scherber, C., Schulze, W., Socher, S.A.,**  
332 **Steckel, J., Steffan-Dewenter, I., Türke, M., Weiner, C.N., Werner, M., Westphal, C., Wolters,**  
333 **V., Wubet, T., Gockel, S., Gorke, M., Hemp, A., Renner, S.C., Schöning, I., Pfeiffer, S., König-Ries,**  
334 **B., Buscot, F., Linsenmair, K.E., Schulze, E.D., Weisser, W.W., & Fischer, M.** 2014. Interannual  
335 variation in land-use intensity enhances grassland multidiversity. *Proc. Natl. Acad. Sci. U. S. A.*  
336 111: 308–313. <https://doi.org/10.1073/pnas.1312213111>
- 337 **Berdugo, M., Delgado-Baquerizo, M., Soliveres, S., Hernández-Clemente, R., Zhao, Y., Gaitán, J.J.,**  
338 **Gross, N., Saiz, H., Maire, V., Lehman, A., Rillig, M.C., Solé, R. V., & Maestre, F.T.** 2020. Global  
339 ecosystem thresholds driven by aridity. *Science* 367: 787–790.  
340 <https://doi.org/10.1126/science.aay5958>
- 341 **Blaalid, R., Carlsen, T., Kumar, S., Halvorsen, R., Ugland, K.I., Fontana, G., & Kauserud, H.** 2012.  
342 Changes in the root-associated fungal communities along a primary succession gradient analysed  
343 by 454 pyrosequencing. *Mol. Ecol.* 21: 1897–1908. [https://doi.org/10.1111/j.1365-](https://doi.org/10.1111/j.1365-294X.2011.05214.x)  
344 [294X.2011.05214.x](https://doi.org/10.1111/j.1365-294X.2011.05214.x)
- 345 **Chang, C., & HilleRisLambers, J.** 2016. Integrating succession and community assembly perspectives.  
346 *F1000Research* 5: 1–10. <https://doi.org/10.12688/F1000RESEARCH.8973.1>
- 347 **Chase, J.M., & Myers, J.A.** 2011. Disentangling the importance of ecological niches from stochastic  
348 processes across scales. *Philos. Trans. R. Soc. B Biol. Sci.* 366: 2351–2363.  
349 <https://doi.org/10.1098/rstb.2011.0063>
- 350 **Chen, C., Chen, H.Y.H., Chen, X., & Huang, Z.** 2019. Meta-analysis shows positive effects of plant



- 351 diversity on microbial biomass and respiration. *Nat. Commun.* 10: 1–10.  
352 <https://doi.org/10.1038/s41467-019-09258-y>
- 353 **Connell, J.H., & Slatyer, R.O.** 1977. Mechanisms of Succession in Natural Communities and Their Role  
354 in Community Stability and Organization. *Am. Nat.* 111: 1119–1144.
- 355 **Crawley, M.J.** 2012. *The R book*. John Wiley & Sons.
- 356 **Delgado-Baquerizo, M., Reich, P.B., Trivedi, C., Eldridge, D.J., Abades, S., Alfaro, F.D., Bastida, F.,**  
357 **Berhe, A.A., Cutler, N.A., Gallardo, A., García-Velázquez, L., Hart, S.C., Hayes, P.E., He, J.Z., Hseu,**  
358 **Z.Y., Hu, H.W., Kirchmair, M., Neuhauser, S., Pérez, C.A., Reed, S.C., Santos, F., Sullivan, B.W.,**  
359 **Trivedi, P., Wang, J.T., Weber-Grullon, L., Williams, M.A., & Singh, B.K.** 2020. Multiple elements  
360 of soil biodiversity drive ecosystem functions across biomes. *Nat. Ecol. Evol.* 4: 210–220.  
361 <https://doi.org/10.1038/s41559-019-1084-y>
- 362 **Dini-Andreote, F., Stegen, J.C., Van Elsas, J.D., & Salles, J.F.** 2015. Disentangling mechanisms that  
363 mediate the balance between stochastic and deterministic processes in microbial succession.  
364 *Proc. Natl. Acad. Sci. U. S. A.* 112: E1326–E1332. <https://doi.org/10.1073/pnas.1414261112>
- 365 **Felipe-Lucia, M.R., Soliveres, S., Penone, C., Fischer, M., Ammer, C., Boch, S., Boeddinghaus, R.S.,**  
366 **Bonkowski, M., Buscot, F., Fiore-Donno, A.M., Frank, K., Goldmann, K., Gossner, M.M., Hölzel,**  
367 **N., Jochum, M., Kandeler, E., Klaus, V.H., Kleinebecker, T., Leimer, S., Manning, P., Oelmann,**  
368 **Y., Saiz, H., Schall, P., Schloter, M., Schöning, I., Schrumpf, M., Solly, E.F., Stempfhuber, B.,**  
369 **Weisser, W.W., Wilcke, W., Wubet, T., & Allan, E.** 2020. Land-use intensity alters networks  
370 between biodiversity, ecosystem functions, and services. *Proc. Natl. Acad. Sci. U. S. A.* 117:  
371 28140–28149. <https://doi.org/10.1073/pnas.2016210117>
- 372 **Fenton, N.J., & Bergeron, Y.** 2013. Stochastic processes dominate during boreal bryophyte community  
373 assembly. *Ecology* 94: 1993–2006. <https://doi.org/10.1890/12-1944.1>
- 374 **Groffman, P.M., Baron, J.S., Blett, T., Gold, A.J., Goodman, I., Gunderson, L.H., Levinson, B.M.,**  
375 **Palmer, M.A., Paerl, H.W., Peterson, G.D., Poff, N.L.R., Rejeski, D.W., Reynolds, J.F., Turner,**

- 376 **M.G., Weathers, K.C., & Wiens, J.** 2006. Ecological thresholds: The key to successful  
377 environmental management or an important concept with no practical application? *Ecosystems*  
378 9: 1–13. <https://doi.org/10.1007/s10021-003-0142-z>
- 379 **Houlahan, J.E., Currie, D.J., Cottenie, K., Cumming, G.S., Ernest, S.K.M., Findlay, C.S., Fuhlendorf, S.D.,**  
380 **Gaedke, U., Legendre, P., Magnuson, J.J., McArdle, B.H., Muldavin, E.H., Noble, D., Russell, R.,**  
381 **Stevens, R.D., Willis, T.J., Woiwod, I.P., & Wondzell, S.M.** 2007. Compensatory dynamics are  
382 rare in natural ecological communities. *Proc. Natl. Acad. Sci. U. S. A.* 104: 3273–3277.  
383 <https://doi.org/10.1073/pnas.0603798104>
- 384 **Howard, M.M., Kao-Kniffin, J., & Kessler, A.** 2020. Shifts in plant–microbe interactions over  
385 community succession and their effects on plant resistance to herbivores. *New Phytol.* 226: 1144–  
386 1157. <https://doi.org/10.1111/nph.16430>
- 387 **Junker, R.R., Hanusch, M., He, X., Ruiz-Hernández, V., Otto, J.C., Kraushaar, S., Bauch, K.,**  
388 **Griessenberger, F., Ohler, L.M., & Trutschnig, W.** 2020. Ödenwinkel: An Alpine platform for  
389 observational and experimental research on the emergence of multidiversity and ecosystem  
390 complexity. *Web Ecol.* 20: 95–106. <https://doi.org/10.5194/we-20-95-2020>
- 391 **Kadowaki, K., Nishijima, S., Kéfi, S., Kameda, K.O., & Sasaki, T.** 2018. Merging community assembly  
392 into the regime-shift approach for informing ecological restoration. *Ecol. Indic.* 85: 991–998.  
393 <https://doi.org/10.1016/j.ecolind.2017.11.035>
- 394 **Kaufmann, R.** 2001. Invertebrate succession on an alpine glacier foreland. *Ecology* 82: 2261–2278.  
395 [https://doi.org/10.1890/0012-9658\(2001\)082\[2261:ISOAAG\]2.0.CO;2](https://doi.org/10.1890/0012-9658(2001)082[2261:ISOAAG]2.0.CO;2)
- 396 **Lowe, W.H., & McPeck, M.A.** 2014. Is dispersal neutral? *Trends Ecol. Evol.* 29: 444–450.  
397 <https://doi.org/10.1016/j.tree.2014.05.009>
- 398 **Lu, M., & Hedin, L.O.** 2019. Global plant–symbiont organization and emergence of biogeochemical  
399 cycles resolved by evolution-based trait modelling. *Nat. Ecol. Evol.* 3: 239–250.  
400 <https://doi.org/10.1038/s41559-018-0759-0>

- 401 **Manning, P., Gossner, M.M., Bossdorf, O., Allan, E., Zhang, Y.Y., Prati, D., Blüthgen, N., Boch, S.,**  
402 **Böhm, S., Börschig, C., Hölzel, N., Jung, K., Klaus, V.H., Klein, A.M., Kleinebecker, T., Krauss, J.,**  
403 **Lange, M., Müller, J., PAŠALIĆ, E., Socher, S.A., Tschapka, M., Türke, M., Weiner, C., Werner, M.,**  
404 **Gockel, S., Hemp, A., Renner, S.C., Wells, K., Buscot, F., Kalko, E.K.V., Linsenmair, K.E., Weisser,**  
405 **W.W., & Fischer, M.** 2015. Grassland management intensification weakens the associations  
406 among the diversities of multiple plant and animal taxa. *Ecology* 96: 1492–1501.  
407 <https://doi.org/10.1890/14-1307.1>
- 408 **Måren, I.E., Kapfer, J., Aarrestad, P.A., Grytnes, J.A., & Vandvik, V.** 2018. Changing contributions of  
409 stochastic and deterministic processes in community assembly over a successional gradient.  
410 *Ecology* 99: 148–157. <https://doi.org/10.1002/ecy.2052>
- 411 **Odum, E.P.** 1969. The strategy of ecosystem development. *Science* 164: 262–270.  
412 <https://doi.org/10.1126/science.164.3877.262>
- 413 **Ohler, L.M., Lechleitner, M., & Junker, R.R.** 2020. Microclimatic effects on alpine plant communities  
414 and flower-visitor interactions. *Sci. Rep.* 10: 1–9. <https://doi.org/10.1038/s41598-020-58388-7>
- 415 **Ohlmann, M., Mazel, F., Chalmandrier, L., Bec, S., Coissac, E., Gielly, L., Pansu, J., Schilling, V.,**  
416 **Taberlet, P., Zinger, L., Chave, J., & Thuiller, W.** 2018. Mapping the imprint of biotic interactions  
417 on  $\beta$ -diversity. *Ecol. Lett.* 21: 1660–1669. <https://doi.org/10.1111/ele.13143>
- 418 **Pulsford, S.A., Lindenmayer, D.B., & Driscoll, D.A.** 2016. A succession of theories: Purging redundancy  
419 from disturbance theory. *Biol. Rev.* 91: 148–167. <https://doi.org/10.1111/brv.12163>
- 420 **Ranta, E., Kaitala, V., Fowler, M.S., Laakso, J., Ruokolainen, L., & O'Hara, R.** 2008. Detecting  
421 compensatory dynamics in competitive communities under environmental forcing. *Oikos* 117:  
422 1907–1911. <https://doi.org/10.1111/j.1600-0706.2008.16614.x>
- 423 **Scheffer, M., Carpenter, S., Foley, J.A., Folke, C., & Walker, B.** 2001. Catastrophic shifts in ecosystems.  
424 *Nature* 413: 591–596. <https://doi.org/10.1038/35098000>

425 **Suding, K.N., & Hobbs, R.J.** 2009. Threshold models in restoration and conservation: a developing  
426 framework. *Trends Ecol. Evol.* 24: 271–279. <https://doi.org/10.1016/j.tree.2008.11.012>

427

428

429 **Acknowledgements**

430 We thank the Hohe Tauern National Park Salzburg administration and the Rudolfshütte for  
431 organizational and logistic support, the governing authority Land Salzburg for the permit to conduct  
432 our research (permit no. 20507-96/45/7-2019), Jan-Christoph Otto, Tobias Seifert, and Anna Vojtkó for  
433 help in the field. Hamed Azarbad, Lisa-Maria Ohler and Verena Zieschank provided valuable comments  
434 to improve the study. This research has been supported by the Austrian Science Fund (FWF), which  
435 provided funding to Robert R. Junker (grant no. Y1102).

436 **Contributions**

437 R.R.J. conceived and initiated the study. M.H., X.H., V.R.H. and R.R.J conducted field work. M.H.  
438 performed the processing and analysis of the data with main inputs from R.R.J. and X.H.. M.H. and  
439 R.R.J. drafted the initial version of the manuscript. All authors contributed critically to the  
440 interpretation of the results, revising, and approving the final version of the manuscript.

441 **Competing interests**

442 The authors declare no competing interests.

443 **Corresponding author**

444 Correspondence and requests for materials should be addressed to Robert R. Junker.

445

446 **Supplementary**

447 Supplementary table 1: Summary of the path analysis of the effects of time since deglaciation and  
448 temperature on organismal groups and multidiversity (final model).

|                              | <u>Early</u>                       |      |          | <u>Late</u> |      |          | <u>Full</u> |      |          |
|------------------------------|------------------------------------|------|----------|-------------|------|----------|-------------|------|----------|
|                              | z                                  | p    | Estimate | z           | p    | Estimate | z           | p    | Estimate |
|                              | <b><u>Regression Slopes</u></b>    |      |          |             |      |          |             |      |          |
| <b><u>Vasc. plants</u></b>   |                                    |      |          |             |      |          |             |      |          |
| Temperature                  | 0.57                               | .568 | 0.16     | 2.51        | .012 | 0.23     | 4.19        | .000 | 0.38     |
| Time s. degl.                | 2.89                               | .004 | 1.37     | -0.39       | .698 | -0.05    | 3.48        | .000 | 0.29     |
| <b><u>Bryophytes</u></b>     |                                    |      |          |             |      |          |             |      |          |
| Temperature                  | 0.28                               | .776 | 0.06     | 2.93        | .003 | 0.43     | 2.32        | .020 | 0.24     |
| Time s. degl.                | 3.09                               | .002 | 1.17     | 2.69        | .007 | 0.54     | 1.70        | .090 | 0.16     |
| <b><u>Bacteria</u></b>       |                                    |      |          |             |      |          |             |      |          |
| Temperature                  | 2.32                               | .020 | 0.60     | 0.79        | .431 | 0.11     | 2.43        | .015 | 0.26     |
| Time s. degl.                | 2.57                               | .010 | 1.11     | -0.02       | .985 | -0.00    | 0.92        | .355 | 0.09     |
| <b><u>Invertebrates</u></b>  |                                    |      |          |             |      |          |             |      |          |
| Temperature                  | -0.84                              | .404 | -0.19    | 1.41        | .159 | 0.20     | 2.09        | .036 | 0.22     |
| Time s. degl.                | 4.60                               | .000 | 1.78     | 0.77        | .441 | 0.15     | 2.61        | .009 | 0.25     |
| <b><u>Fungi</u></b>          |                                    |      |          |             |      |          |             |      |          |
| Temperature                  | -0.29                              | .770 | -0.08    | -0.09       | .931 | -0.01    | 1.38        | .167 | 0.15     |
| Time s. degl.                | 2.14                               | .033 | 0.92     | -2.46       | .014 | -0.50    | -1.45       | .147 | -0.14    |
| <b><u>Multidiversity</u></b> |                                    |      |          |             |      |          |             |      |          |
| Bacteria                     | 7.08                               | .000 | 0.30     | 7.01        | .000 | 0.35     | 9.78        | .000 | 0.32     |
| Bryophytes                   | 7.76                               | .000 | 0.43     | 9.06        | .000 | 0.38     | 12.31       | .000 | 0.41     |
| Vasc. plants                 | 7.17                               | .000 | 0.28     | 4.96        | .000 | 0.37     | 8.96        | .000 | 0.32     |
| Invertebrates                | 8.32                               | .000 | 0.37     | 6.41        | .000 | 0.30     | 9.93        | .000 | 0.33     |
| Fungi                        | 7.35                               | .000 | 0.35     | 4.76        | .000 | 0.22     | 8.41        | .000 | 0.28     |
|                              | <b><u>Residual Variances</u></b>   |      |          |             |      |          |             |      |          |
| Vasc. plants                 | 4.95                               | .000 | 0.91     | 5.52        | .000 | 0.37     | 7.42        | .000 | 0.68     |
| Bryophytes                   | 4.95                               | .000 | 0.58     | 5.52        | .000 | 0.98     | 7.42        | .000 | 0.90     |
| Bacteria                     | 4.95                               | .000 | 0.76     | 5.52        | .000 | 0.86     | 7.42        | .000 | 0.93     |
| Invertebrates                | 4.95                               | .000 | 0.61     | 5.52        | .000 | 0.94     | 7.42        | .000 | 0.88     |
| Fungi                        | 4.95                               | .000 | 0.75     | 5.52        | .000 | 1.00     | 7.42        | .000 | 0.96     |
| Multidiversity               | 4.95                               | .000 | 0.08     | 5.52        | .000 | 0.12     | 7.42        | .000 | 0.11     |
| Temperature                  | 4.95                               | .000 | 0.31     | 5.52        | .000 | 0.93     | 7.42        | .000 | 0.77     |
| Time s. degl.                | 4.95                               | .000 | 0.11     | 5.52        | .000 | 0.49     | 7.42        | .000 | 0.90     |
|                              | <b><u>Residual Covariances</u></b> |      |          |             |      |          |             |      |          |
| Bacteria w/Fungi             | -0.90                              | .371 | -0.10    | 2.19        | .029 | 0.27     | 1.78        | .076 | 0.16     |

|                                 |         |      |       |         |                    |       |         |      |      |
|---------------------------------|---------|------|-------|---------|--------------------|-------|---------|------|------|
| Bryophytes w/Fungi              | 1.10    | .273 | 0.11  | 0.63    | .531               | 0.08  | 1.07    | .284 | 0.10 |
| Vasc. plants w/Fungi            | 0.44    | .659 | 0.05  | 2.14    | .032               | 0.17  | 2.42    | .016 | 0.19 |
| Invertebrates w/Fungi           | -1.82   | .068 | -0.18 | 1.95    | .052               | 0.25  | 1.39    | .164 | 0.12 |
| Bryophytes w/Bacteria           | 1.45    | .146 | 0.14  | 0.04    | .968               | 0.00  | 1.32    | .188 | 0.12 |
| Vasc. plants w/Bacteria         | -0.87   | .384 | -0.10 | 0.81    | .417               | 0.06  | 0.57    | .566 | 0.04 |
| Bacteria w/Invertebrates        | -1.17   | .243 | -0.11 | 0.86    | .391               | 0.10  | 0.82    | .412 | 0.07 |
| Vasc. plants w/Bryophytes       | -0.06   | .953 | -0.01 | 1.20    | .228               | 0.09  | 0.76    | .448 | 0.06 |
| Bryophytes<br>w/Invertebrates   | -0.39   | .694 | -0.03 | 0.04    | .968               | 0.00  | 0.53    | .597 | 0.05 |
| Vasc. plants<br>w/Invertebrates | -1.07   | .284 | -0.12 | 0.77    | .441               | 0.06  | 0.65    | .515 | 0.05 |
| Temperature w/Time s.<br>degl.  | 3.15    | .002 | 0.09  | -3.15   | .002               | -0.30 | 1.62    | .105 | 0.13 |
|                                 |         |      |       |         | <b>Constructed</b> |       |         |      |      |
| Time indirect                   | 7.08    | .000 | 2.20  | 0.75    | .454               | 0.12  | 2.71    | .007 | 0.23 |
| Temp. indirect                  | 0.87    | .385 | 0.16  | 2.86    | .004               | 0.34  | 4.51    | .000 | 0.41 |
|                                 |         |      |       |         | <b>Fit Indices</b> |       |         |      |      |
| RMSEA                           | 0.00    |      |       | 0.08    |                    |       | 0.08    |      |      |
| RMSEA.CI.LOWER                  | 0.00    |      |       | 0.00    |                    |       | 0.00    |      |      |
| RMSEA.CI.UPPER                  | 0.22    |      |       | 0.28    |                    |       | 0.22    |      |      |
| CFI                             | 1.00    |      |       | 0.99    |                    |       | 1.00    |      |      |
| TLI                             | 1.08    |      |       | 0.92    |                    |       | 0.94    |      |      |
| $\chi^2$                        | 0.87(2) | .646 |       | 2.84(2) | .242               |       | 3.37(2) | .186 |      |
| DF                              | 2.00    |      |       | 2.00    |                    |       | 2.00    |      |      |
| RMR                             | 0.00    |      |       | 0.01    |                    |       | 0.01    |      |      |

449

450



451

452 Supplementary table 2: Summary of the path analysis of the effects of time since deglaciation,

453 temperature, pH-value and soil nutrients on organismal groups and multidiversity (model not used).

|                              | <u>Early</u>                    |      |          | <u>Late</u> |      |          | <u>Full</u> |      |          |
|------------------------------|---------------------------------|------|----------|-------------|------|----------|-------------|------|----------|
|                              | z                               | p    | Estimate | z           | p    | Estimate | z           | p    | Estimate |
|                              | <b><u>Regression Slopes</u></b> |      |          |             |      |          |             |      |          |
| <b><u>Vasc. plants</u></b>   |                                 |      |          |             |      |          |             |      |          |
| Temperature                  | 0.79                            | .430 | 0.19     | 1.69        | .092 | 0.13     | 4.20        | .000 | 0.39     |
| Time s. degl.                | 2.64                            | .008 | 1.37     | 0.32        | .752 | 0.04     | 2.43        | .015 | 0.24     |
| Soil nutrients               | 2.41                            | .016 | 0.42     | -1.53       | .126 | -0.13    | 0.90        | .369 | 0.08     |
| pH-value                     | 1.25                            | .211 | 0.20     | -1.19       | .232 | -0.12    | -0.55       | .580 | -0.05    |
| <b><u>Bryophytes</u></b>     |                                 |      |          |             |      |          |             |      |          |
| Temperature                  | 0.26                            | .794 | 0.05     | 3.36        | .001 | 0.44     | 2.31        | .021 | 0.24     |
| Time s. degl.                | 2.54                            | .011 | 1.13     | 2.15        | .032 | 0.49     | 0.81        | .419 | 0.09     |
| Soil nutrients               | 0.03                            | .978 | 0.00     | 0.70        | .482 | 0.09     | 1.01        | .310 | 0.11     |
| pH-value                     | -0.21                           | .833 | -0.03    | -0.48       | .632 | -0.08    | -0.75       | .452 | -0.07    |
| <b><u>Bacteria</u></b>       |                                 |      |          |             |      |          |             |      |          |
| Temperature                  | 2.66                            | .008 | 0.63     | 0.70        | .484 | 0.08     | 1.96        | .051 | 0.21     |
| Time s. degl.                | 2.45                            | .014 | 1.24     | -0.22       | .823 | -0.05    | -0.08       | .936 | -0.01    |
| Soil nutrients               | -0.55                           | .583 | -0.09    | 0.76        | .447 | 0.09     | 1.06        | .288 | 0.11     |
| pH-value                     | 0.33                            | .741 | 0.05     | -1.17       | .242 | -0.18    | -1.84       | .066 | -0.18    |
| <b><u>Invertebrates</u></b>  |                                 |      |          |             |      |          |             |      |          |
| Temperature                  | -0.64                           | .522 | -0.13    | 1.27        | .204 | 0.16     | 1.08        | .279 | 0.11     |
| Time s. degl.                | 4.77                            | .000 | 2.10     | 0.68        | .497 | 0.15     | 2.18        | .029 | 0.24     |
| Soil nutrients               | -1.73                           | .084 | -0.26    | 0.16        | .873 | 0.02     | -0.57       | .572 | -0.06    |
| pH-value                     | 0.82                            | .412 | 0.11     | -0.86       | .388 | -0.14    | -1.72       | .085 | -0.17    |
| <b><u>Fungi</u></b>          |                                 |      |          |             |      |          |             |      |          |
| Temperature                  | -0.31                           | .758 | -0.07    | 0.87        | .387 | 0.11     | 1.34        | .182 | 0.14     |
| Time s. degl.                | 1.80                            | .071 | 0.91     | -3.33       | .001 | -0.73    | -2.69       | .007 | -0.30    |
| Soil nutrients               | 0.43                            | .665 | 0.07     | 2.82        | .005 | 0.36     | 2.16        | .030 | 0.23     |
| pH-value                     | 0.18                            | .857 | 0.03     | -0.44       | .660 | -0.07    | -1.80       | .072 | -0.18    |
| <b><u>Multidiversity</u></b> |                                 |      |          |             |      |          |             |      |          |
| Bacteria                     | 7.04                            | .000 | 0.30     | 7.01        | .000 | 0.35     | 9.72        | .000 | 0.32     |
| Bryophytes                   | 7.78                            | .000 | 0.43     | 9.61        | .000 | 0.38     | 12.32       | .000 | 0.41     |
| Vasc. plants                 | 7.15                            | .000 | 0.28     | 4.87        | .000 | 0.37     | 9.07        | .000 | 0.32     |
| Invertebrates                | 8.33                            | .000 | 0.37     | 6.42        | .000 | 0.30     | 9.89        | .000 | 0.33     |

|                                    |       |      |       |       |      |       |       |      |       |
|------------------------------------|-------|------|-------|-------|------|-------|-------|------|-------|
| Fungi                              | 7.34  | .000 | 0.35  | 4.78  | .000 | 0.22  | 8.42  | .000 | 0.28  |
| <b><u>Residual Variances</u></b>   |       |      |       |       |      |       |       |      |       |
| Vasc. plants                       | 4.95  | .000 | 0.80  | 5.52  | .000 | 0.36  | 7.42  | .000 | 0.68  |
| Bryophytes                         | 4.95  | .000 | 0.58  | 5.52  | .000 | 0.97  | 7.42  | .000 | 0.89  |
| Bacteria                           | 4.95  | .000 | 0.75  | 5.52  | .000 | 0.83  | 7.42  | .000 | 0.89  |
| Invertebrates                      | 4.95  | .000 | 0.57  | 5.52  | .000 | 0.93  | 7.42  | .000 | 0.87  |
| Fungi                              | 4.95  | .000 | 0.75  | 5.52  | .000 | 0.88  | 7.42  | .000 | 0.90  |
| Multidiversity                     | 4.95  | .000 | 0.08  | 5.52  | .000 | 0.12  | 7.42  | .000 | 0.11  |
| Temperature                        | 4.95  | .000 | 0.31  | 5.52  | .000 | 0.93  | 7.42  | .000 | 0.77  |
| Time s. degl.                      | 5.12  | .000 | 0.09  | 5.63  | .000 | 0.47  | 7.53  | .000 | 0.90  |
| Soil nutrients                     | 4.95  | .000 | 0.56  | 5.52  | .000 | 1.26  | 7.42  | .000 | 0.99  |
| pH-value                           | 4.95  | .000 | 0.88  | 5.52  | .000 | 0.61  | 7.42  | .000 | 0.85  |
| <b><u>Residual Covariances</u></b> |       |      |       |       |      |       |       |      |       |
| Bacteria w/Fungi                   | -0.88 | .381 | -0.09 | 1.95  | .052 | 0.22  | 1.37  | .172 | 0.12  |
| Bryophytes w/Fungi                 | 1.10  | .270 | 0.11  | 0.35  | .724 | 0.04  | 0.78  | .436 | 0.07  |
| Vasc. plants w/Fungi               | 0.30  | .765 | 0.03  | 2.56  | .011 | 0.19  | 2.25  | .025 | 0.17  |
| Invertebrates w/Fungi              | -1.81 | .071 | -0.17 | 1.89  | .059 | 0.23  | 1.31  | .190 | 0.11  |
| Bryophytes w/Bacteria              | 1.47  | .142 | 0.14  | -0.13 | .894 | -0.02 | 1.12  | .262 | 0.10  |
| Vasc. plants w/Bacteria            | -0.81 | .420 | -0.09 | 0.85  | .394 | 0.06  | 0.40  | .690 | 0.03  |
| Bacteria w/Invertebrates           | -1.36 | .175 | -0.13 | 0.72  | .473 | 0.08  | 0.67  | .502 | 0.06  |
| Vasc. plants w/Bryophytes          | -0.04 | .970 | -0.00 | 1.28  | .200 | 0.10  | 0.64  | .522 | 0.05  |
| Bryophytes w/Invertebrates         | -0.38 | .703 | -0.03 | -0.05 | .961 | -0.01 | 0.48  | .632 | 0.04  |
| Vasc. plants w/Invertebrates       | -0.75 | .454 | -0.07 | 0.75  | .453 | 0.06  | 0.62  | .535 | 0.05  |
| Time s. degl. w/Soil nutrients     | 1.71  | .088 | 0.05  | 3.79  | .000 | 0.41  | 4.70  | .000 | 0.46  |
| Time s. degl. w/pH-value           | -3.23 | .001 | -0.14 | 2.26  | .024 | 0.14  | -1.59 | .112 | -0.11 |
| Temperature w/Time s. degl.        | 2.21  | .027 | 0.05  | -0.55 | .582 | -0.04 | 2.41  | .016 | 0.17  |
| <b><u>Constructed</u></b>          |       |      |       |       |      |       |       |      |       |
| Time indirect                      | 6.47  | .000 | 2.34  | 0.39  | .698 | 0.07  | 1.09  | .277 | 0.10  |
| Temp. indirect                     | 1.18  | .240 | 0.19  | 3.08  | .002 | 0.32  | 4.05  | .000 | 0.36  |
| pH indirect                        | 1.05  | .296 | 0.11  | -1.50 | .134 | -0.20 | -2.49 | .013 | -0.21 |
| Soil nutr. ind.                    | 0.21  | .836 | 0.02  | 1.03  | .302 | 0.11  | 1.68  | .093 | 0.15  |
| <b><u>Fit Indices</u></b>          |       |      |       |       |      |       |       |      |       |
| RMSEA                              | 0.21  |      |       | 0.31  |      |       | 0.25  |      |       |
| RMSEA.CI.LOWER                     | 0.11  |      |       | 0.23  |      |       | 0.20  |      |       |

|                |          |      |          |      |          |      |
|----------------|----------|------|----------|------|----------|------|
| RMSEA.CI.UPPER | 0.31     |      | 0.39     |      | 0.32     |      |
| CFI            | 0.93     |      | 0.81     |      | 0.87     |      |
| TLI            | 0.57     |      | -0.24    |      | 0.17     |      |
| $\chi^2$       | 21.92(7) | .003 | 47.19(7) | .000 | 56.65(7) | .000 |
| DF             | 7.00     |      | 7.00     |      | 7.00     |      |
| RMR            | 0.07     |      | 0.12     |      | 0.08     |      |

454

455

456

457 Supplementary table 3: Summary of the path analysis of the effects of time since deglaciation,

458 temperature and pH-value on organismal groups and multidiversity (model not used).

459

|                              | <u>Early</u>                     |             |             | <u>Late</u> |             |             | <u>Full</u> |             |             |
|------------------------------|----------------------------------|-------------|-------------|-------------|-------------|-------------|-------------|-------------|-------------|
|                              | z                                | p           | Estimate    | z           | p           | Estimate    | z           | p           | Estimate    |
|                              | <b><u>Regression Slopes</u></b>  |             |             |             |             |             |             |             |             |
| <b><u>Vasc. plants</u></b>   |                                  |             |             |             |             |             |             |             |             |
| Temperature                  | <b>0.83</b>                      | <b>.409</b> | <b>0.24</b> | <b>2.11</b> | <b>.035</b> | <b>0.21</b> | <b>3.34</b> | <b>.001</b> | <b>0.35</b> |
| Time s. degl.                | 3.14                             | .002        | 1.67        | -0.34       | .732        | -0.04       | 3.19        | .001        | 0.28        |
| pH-value                     | 1.18                             | .237        | 0.22        | -0.54       | .592        | -0.06       | -0.65       | .516        | -0.07       |
| <b><u>Bryophytes</u></b>     |                                  |             |             |             |             |             |             |             |             |
| Temperature                  | 0.23                             | .814        | 0.05        | 2.44        | .015        | 0.39        | 1.62        | .105        | 0.19        |
| Time s. degl.                | 2.62                             | .009        | 1.13        | 2.75        | .006        | 0.56        | 1.42        | .156        | 0.14        |
| pH-value                     | -0.19                            | .848        | -0.03       | -0.71       | .479        | -0.13       | -0.84       | .401        | -0.10       |
| <b><u>Bacteria</u></b>       |                                  |             |             |             |             |             |             |             |             |
| Temperature                  | 2.33                             | .020        | 0.62        | 0.21        | .832        | 0.03        | 1.29        | .197        | 0.15        |
| Time s. degl.                | 2.39                             | .017        | 1.18        | 0.10        | .923        | 0.02        | 0.44        | .660        | 0.04        |
| pH-value                     | 0.28                             | .781        | 0.05        | -1.37       | .170        | -0.23       | -1.76       | .079        | -0.21       |
| <b><u>Invertebrates</u></b>  |                                  |             |             |             |             |             |             |             |             |
| Temperature                  | -0.67                            | .502        | -0.16       | 0.98        | .329        | 0.15        | 1.19        | .233        | 0.14        |
| Time s. degl.                | 4.37                             | .000        | 1.92        | 0.85        | .397        | 0.17        | 2.18        | .029        | 0.21        |
| pH-value                     | 0.66                             | .509        | 0.10        | -0.87       | .387        | -0.15       | -1.33       | .184        | -0.15       |
| <b><u>Fungi</u></b>          |                                  |             |             |             |             |             |             |             |             |
| Temperature                  | -0.24                            | .807        | -0.06       | -0.62       | .537        | -0.10       | 0.28        | .776        | 0.03        |
| Time s. degl.                | 1.96                             | .050        | 0.96        | -2.38       | .017        | -0.48       | -1.93       | .053        | -0.20       |
| pH-value                     | 0.18                             | .855        | 0.03        | -1.40       | .162        | -0.25       | -1.93       | .054        | -0.23       |
| <b><u>Multidiversity</u></b> |                                  |             |             |             |             |             |             |             |             |
| Bacteria                     | 7.08                             | .000        | 0.30        | 7.01        | .000        | 0.35        | 9.78        | .000        | 0.32        |
| Bryophytes                   | 7.76                             | .000        | 0.43        | 9.06        | .000        | 0.38        | 12.31       | .000        | 0.41        |
| Vasc. plants                 | 7.17                             | .000        | 0.28        | 4.96        | .000        | 0.37        | 8.96        | .000        | 0.32        |
| Invertebrates                | 8.32                             | .000        | 0.37        | 6.41        | .000        | 0.30        | 9.93        | .000        | 0.33        |
| Fungi                        | 7.35                             | .000        | 0.35        | 4.76        | .000        | 0.22        | 8.41        | .000        | 0.28        |
|                              | <b><u>Residual Variances</u></b> |             |             |             |             |             |             |             |             |
| Vasc. plants                 | 4.95                             | .000        | 0.89        | 5.52        | .000        | 0.37        | 7.42        | .000        | 0.68        |
| Bryophytes                   | 4.95                             | .000        | 0.58        | 5.52        | .000        | 0.98        | 7.42        | .000        | 0.90        |

|                                    |       |      |       |       |      |       |       |      |       |
|------------------------------------|-------|------|-------|-------|------|-------|-------|------|-------|
| Bacteria                           | 4.95  | .000 | 0.76  | 5.52  | .000 | 0.83  | 7.42  | .000 | 0.90  |
| Invertebrates                      | 4.95  | .000 | 0.60  | 5.52  | .000 | 0.93  | 7.42  | .000 | 0.87  |
| Fungi                              | 4.95  | .000 | 0.75  | 5.52  | .000 | 0.96  | 7.42  | .000 | 0.93  |
| Multidiversity                     | 4.95  | .000 | 0.08  | 5.52  | .000 | 0.12  | 7.42  | .000 | 0.11  |
| Temperature                        | 4.95  | .000 | 0.31  | 5.52  | .000 | 0.93  | 7.42  | .000 | 0.77  |
| Time s. degl.                      | 4.95  | .000 | 0.11  | 5.52  | .000 | 0.49  | 7.42  | .000 | 0.90  |
| pH-value                           | 4.95  | .000 | 0.88  | 5.52  | .000 | 0.61  | 7.42  | .000 | 0.85  |
| <b><u>Residual Covariances</u></b> |       |      |       |       |      |       |       |      |       |
| Bacteria w/Fungi                   | -0.90 | .366 | -0.10 | 2.03  | .042 | 0.24  | 1.52  | .129 | 0.13  |
| Bryophytes w/Fungi                 | 1.10  | .270 | 0.11  | 0.51  | .608 | 0.06  | 0.94  | .347 | 0.08  |
| Vasc. plants w/Fungi               | 0.42  | .677 | 0.05  | 2.09  | .037 | 0.17  | 2.35  | .019 | 0.18  |
| Invertebrates w/Fungi              | -1.85 | .065 | -0.18 | 1.84  | .065 | 0.23  | 1.19  | .235 | 0.10  |
| Bryophytes w/Bacteria              | 1.46  | .143 | 0.14  | -0.08 | .934 | -0.01 | 1.20  | .230 | 0.10  |
| Vasc. plants w/Bacteria            | -0.93 | .353 | -0.11 | 0.73  | .464 | 0.05  | 0.47  | .635 | 0.04  |
| Bacteria w/Invertebrates           | -1.20 | .231 | -0.12 | 0.73  | .467 | 0.08  | 0.62  | .537 | 0.05  |
| Vasc. plants w/Bryophytes          | -0.03 | .979 | -0.00 | 1.17  | .244 | 0.09  | 0.71  | .477 | 0.05  |
| Bryophytes w/Invertebrates         | -0.38 | .706 | -0.03 | -0.04 | .969 | -0.00 | 0.43  | .668 | 0.04  |
| Vasc. plants w/Invertebrates       | -1.20 | .231 | -0.13 | 0.72  | .473 | 0.05  | 0.58  | .565 | 0.04  |
| Temperature w/Time s. degl.        | 3.15  | .002 | 0.09  | -3.15 | .002 | -0.30 | 1.62  | .105 | 0.13  |
| Temperature w/pH-value             | -2.90 | .004 | -0.24 | -3.20 | .001 | -0.34 | -4.75 | .000 | -0.41 |
| Time s. degl. w/pH-value           | -3.59 | .000 | -0.19 | 2.01  | .045 | 0.15  | -3.05 | .002 | -0.27 |
| <b><u>Constructed</u></b>          |       |      |       |       |      |       |       |      |       |
| Time indirect                      | 6.74  | .000 | 2.36  | 0.91  | .361 | 0.15  | 2.05  | .041 | 0.18  |
| Temp. indirect                     | 1.07  | .286 | 0.19  | 2.05  | .040 | 0.26  | 2.88  | .004 | 0.29  |
| pH indirect                        | 0.97  | .335 | 0.11  | -1.78 | .075 | -0.25 | -2.42 | .016 | -0.24 |
| <b><u>Fit Indices</u></b>          |       |      |       |       |      |       |       |      |       |
| RMSEA                              | 0.12  |      |       | 0.04  |      |       | 0.08  |      |       |
| RMSEA.CI.LOWER                     | 0.00  |      |       | 0.00  |      |       | 0.00  |      |       |
| RMSEA.CI.UPPER                     | 0.29  |      |       | 0.22  |      |       | 0.20  |      |       |
| CFI                                | 0.99  |      |       | 1.00  |      |       | 0.99  |      |       |
| TLI                                | 0.88  |      |       | 0.98  |      |       | 0.92  |      |       |

|          |         |      |         |      |         |      |
|----------|---------|------|---------|------|---------|------|
| $\chi^2$ | 5.07(3) | .167 | 3.31(3) | .347 | 5.13(3) | .163 |
| DF       | 3.00    |      | 3.00    |      | 3.00    |      |
| RMR      | 0.01    |      | 0.01    |      | 0.01    |      |

461 Supplementary table 4: Summary of the path analysis of the effects of time since deglaciation,  
 462 temperature and soil nutrients on organismal groups and multidiversity (model not used).

463

|                                  | <u>Early</u> |      |          | <u>Late</u> |      |          | <u>Full</u> |      |          |
|----------------------------------|--------------|------|----------|-------------|------|----------|-------------|------|----------|
|                                  | z            | p    | Estimate | z           | p    | Estimate | z           | p    | Estimate |
| <b><u>Regression Slopes</u></b>  |              |      |          |             |      |          |             |      |          |
| <b><u>Vasc. plants</u></b>       |              |      |          |             |      |          |             |      |          |
| Temperature                      | 0.45         | .651 | 0.12     | 1.99        | .047 | 0.19     | 4.28        | .000 | 0.41     |
| Time s. degl.                    | 2.35         | .019 | 1.09     | 0.05        | .957 | 0.01     | 2.50        | .012 | 0.24     |
| Soil nutrients                   | 2.37         | .018 | 0.43     | -0.97       | .331 | -0.09    | 0.96        | .335 | 0.09     |
| <b><u>Bryophytes</u></b>         |              |      |          |             |      |          |             |      |          |
| Temperature                      | 0.28         | .778 | 0.06     | 3.04        | .002 | 0.48     | 2.58        | .010 | 0.29     |
| Time s. degl.                    | 2.99         | .003 | 1.17     | 2.11        | .035 | 0.47     | 0.89        | .373 | 0.10     |
| Soil nutrients                   | 0.02         | .985 | 0.00     | 0.83        | .405 | 0.12     | 1.11        | .266 | 0.12     |
| <b><u>Bacteria</u></b>           |              |      |          |             |      |          |             |      |          |
| Temperature                      | 2.36         | .018 | 0.61     | 1.16        | .246 | 0.17     | 2.76        | .006 | 0.31     |
| Time s. degl.                    | 2.62         | .009 | 1.17     | -0.50       | .620 | -0.10    | 0.11        | .913 | 0.01     |
| Soil nutrients                   | -0.52        | .602 | -0.09    | 1.14        | .255 | 0.15     | 1.34        | .180 | 0.15     |
| <b><u>Invertebrates</u></b>      |              |      |          |             |      |          |             |      |          |
| Temperature                      | -0.75        | .452 | -0.17    | 1.49        | .137 | 0.23     | 1.88        | .060 | 0.21     |
| Time s. degl.                    | 4.99         | .000 | 1.94     | 0.50        | .614 | 0.11     | 2.35        | .019 | 0.26     |
| Soil nutrients                   | -1.64        | .100 | -0.25    | 0.47        | .639 | 0.07     | -0.23       | .817 | -0.02    |
| <b><u>Fungi</u></b>              |              |      |          |             |      |          |             |      |          |
| Temperature                      | -0.32        | .750 | -0.08    | 0.94        | .346 | 0.14     | 2.16        | .031 | 0.24     |
| Time s. degl.                    | 1.96         | .050 | 0.87     | -3.55       | .000 | -0.75    | -2.50       | .012 | -0.28    |
| Soil nutrients                   | 0.43         | .667 | 0.08     | 2.79        | .005 | 0.39     | 2.39        | .017 | 0.26     |
| <b><u>Multidiversity</u></b>     |              |      |          |             |      |          |             |      |          |
| Bacteria                         | 7.08         | .000 | 0.30     | 7.01        | .000 | 0.35     | 9.78        | .000 | 0.32     |
| Bryophytes                       | 7.76         | .000 | 0.43     | 9.06        | .000 | 0.38     | 12.31       | .000 | 0.41     |
| Vasc. plants                     | 7.17         | .000 | 0.28     | 4.96        | .000 | 0.37     | 8.96        | .000 | 0.32     |
| Invertebrates                    | 8.32         | .000 | 0.37     | 6.41        | .000 | 0.30     | 9.93        | .000 | 0.33     |
| Fungi                            | 7.35         | .000 | 0.35     | 4.76        | .000 | 0.22     | 8.41        | .000 | 0.28     |
| <b><u>Residual Variances</u></b> |              |      |          |             |      |          |             |      |          |
| Vasc. plants                     | 4.95         | .000 | 0.82     | 5.52        | .000 | 0.37     | 7.42        | .000 | 0.68     |
| Bryophytes                       | 4.95         | .000 | 0.58     | 5.52        | .000 | 0.97     | 7.42        | .000 | 0.89     |
| Bacteria                         | 4.95         | .000 | 0.75     | 5.52        | .000 | 0.84     | 7.42        | .000 | 0.91     |
| Invertebrates                    | 4.95         | .000 | 0.58     | 5.52        | .000 | 0.94     | 7.42        | .000 | 0.88     |

|                                    |         |      |       |         |      |       |         |      |       |
|------------------------------------|---------|------|-------|---------|------|-------|---------|------|-------|
| Fungi                              | 4.95    | .000 | 0.75  | 5.52    | .000 | 0.88  | 7.42    | .000 | 0.91  |
| Multidiversity                     | 4.95    | .000 | 0.08  | 5.52    | .000 | 0.12  | 7.42    | .000 | 0.11  |
| Temperature                        | 4.95    | .000 | 0.31  | 5.52    | .000 | 0.93  | 7.42    | .000 | 0.77  |
| Time s. degl.                      | 4.95    | .000 | 0.11  | 5.52    | .000 | 0.49  | 7.42    | .000 | 0.90  |
| Soil nutrients                     | 4.95    | .000 | 0.56  | 5.52    | .000 | 1.26  | 7.42    | .000 | 0.99  |
| <b><u>Residual Covariances</u></b> |         |      |       |         |      |       |         |      |       |
| Bacteria w/Fungi                   | -0.87   | .385 | -0.09 | 1.97    | .049 | 0.22  | 1.54    | .123 | 0.14  |
| Bryophytes w/Fungi                 | 1.10    | .272 | 0.11  | 0.37    | .710 | 0.04  | 0.86    | .392 | 0.07  |
| Vasc. plants w/Fungi               | 0.32    | .748 | 0.04  | 2.58    | .010 | 0.20  | 2.28    | .023 | 0.18  |
| Invertebrates<br>w/Fungi           | -1.78   | .075 | -0.17 | 1.91    | .056 | 0.23  | 1.48    | .140 | 0.13  |
| Bryophytes<br>w/Bacteria           | 1.46    | .144 | 0.14  | -0.08   | .936 | -0.01 | 1.20    | .232 | 0.10  |
| Vasc. plants<br>w/Bacteria         | -0.75   | .455 | -0.08 | 0.97    | .334 | 0.07  | 0.46    | .647 | 0.03  |
| Bacteria<br>w/Invertebrates        | -1.32   | .188 | -0.13 | 0.80    | .423 | 0.09  | 0.86    | .391 | 0.07  |
| Vasc. plants<br>w/Bryophytes       | -0.07   | .946 | -0.01 | 1.32    | .187 | 0.10  | 0.66    | .506 | 0.05  |
| Bryophytes<br>w/Invertebrates      | -0.40   | .690 | -0.03 | -0.01   | .992 | -0.00 | 0.56    | .578 | 0.05  |
| Vasc. plants<br>w/Invertebrates    | -0.62   | .538 | -0.06 | 0.84    | .404 | 0.06  | 0.67    | .500 | 0.05  |
| Temperature w/Time<br>s. degl.     | 3.15    | .002 | 0.09  | -3.15   | .002 | -0.30 | 1.62    | .105 | 0.13  |
| Temperature w/Soil<br>nutrients    | 1.47    | .142 | 0.09  | -3.60   | .000 | -0.56 | -2.39   | .017 | -0.20 |
| Time s. degl. w/Soil<br>nutrients  | 2.15    | .031 | 0.08  | 3.77    | .000 | 0.43  | 4.36    | .000 | 0.43  |
| <b><u>Constructed</u></b>          |         |      |       |         |      |       |         |      |       |
| Time indirect                      | 6.80    | .000 | 2.18  | 0.06    | .949 | 0.01  | 1.33    | .184 | 0.13  |
| Temp. indirect                     | 0.85    | .394 | 0.15  | 3.27    | .001 | 0.41  | 4.99    | .000 | 0.48  |
| Soil nutr. ind.                    | 0.24    | .810 | 0.03  | 1.50    | .134 | 0.17  | 2.03    | .042 | 0.19  |
| <b><u>Fit Indices</u></b>          |         |      |       |         |      |       |         |      |       |
| RMSEA                              | 0.06    |      |       | 0.16    |      |       | 0.08    |      |       |
| RMSEA.CI.LOWER                     | 0.00    |      |       | 0.00    |      |       | 0.00    |      |       |
| RMSEA.CI.UPPER                     | 0.26    |      |       | 0.30    |      |       | 0.19    |      |       |
| CFI                                | 1.00    |      |       | 0.97    |      |       | 0.99    |      |       |
| TLI                                | 0.96    |      |       | 0.67    |      |       | 0.93    |      |       |
| $\chi^2$                           | 3.62(3) | .305 |       | 7.43(3) | .059 |       | 5.01(3) | .171 |       |



|     |      |      |      |
|-----|------|------|------|
| DF  | 3.00 | 3.00 | 3.00 |
| RMR | 0.01 | 0.01 | 0.01 |
